# Supplementary material for: Exploring the Bioactive Content of Liquid Waste and Byproducts Produced by Two-Phase Olive Mills in Laconia (Greece): Is There a Prospect for Added-Value Applications?
Source: MDPI journal article supplement (doi:10.3390/foods12244421), 2023-12-09
Supplement: s1 [file s1]

## SUPPLEMENTARY MATERIAL

# Exploring the Bioactive Content of Liquid Waste and Byproducts Produced by Two-Phase Olive Mills in Laconia (Greece): Is There a Prospect for Added-Value Applications?

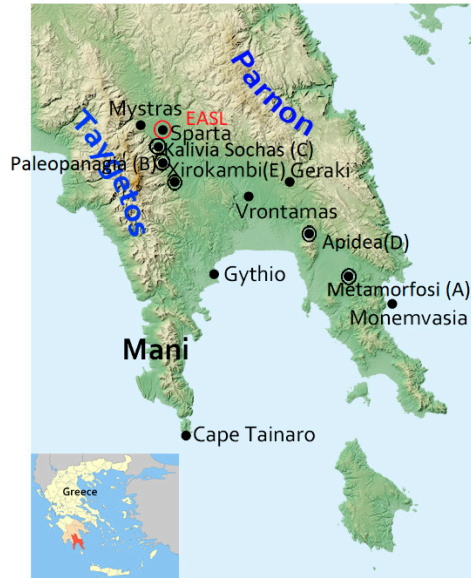

**Figure S1.** Olive mills with two-phase decanter (A-E) and EASL location in Laconia region.

**Table S1.** Residual moisture content of leaves and olive pomace (2021-2022, 2022-2023 harvest periods) dried at 70 and/or 140 °C

| samples | Residual moisture content |            |              |            |           |                      |
|---------|---------------------------|------------|--------------|------------|-----------|----------------------|
|         | Olive Leaves              |            | Olive Pomace |            |           |                      |
|         | 70 °C*/**                 | 140 °C*/** | 70 °C*/***   | 140 °C*/** | 70 °C*/** | 70 °C*/***           |
| A       | 7.4±7.1                   | 8.0±10.4   | 8.1±0.1      | 2.2±1.3    | -         | 8.8±1.8 <sup>a</sup> |
| B       | 4.5±1.2                   | 4.3±1.4    | -            | 2.1±0.9    | 3.7       | -                    |
| C       | 4.7±1.2                   | 3.5±1.4    | 8.4±0.2      | 3.0±2.3    | 4.8       | 5.6±0.7 <sup>b</sup> |
| D       | 6.4±2.9                   | 4.2±2.9    | 8.1±0.3      | 1.7±0.7    | -         | 8.1±1.1 <sup>a</sup> |
| E       | 5.0±3.1                   | 4.0±1.7    | -            | 2.8±1.8    | 5.2       | -                    |

A-E: mills with two-phase decanters,

\*Values (A-E) are means of 6 samplings within a 4 month period of operation analyzed in triplicate ( $n=6 \times 3$ ) ± SD. Values in the same column with different superscripts differ significantly ( $p \leq 0.05$ ).

\*\* collected at 2021-2022 harvest period

\*\*\*collected at 2022-2023 harvest period

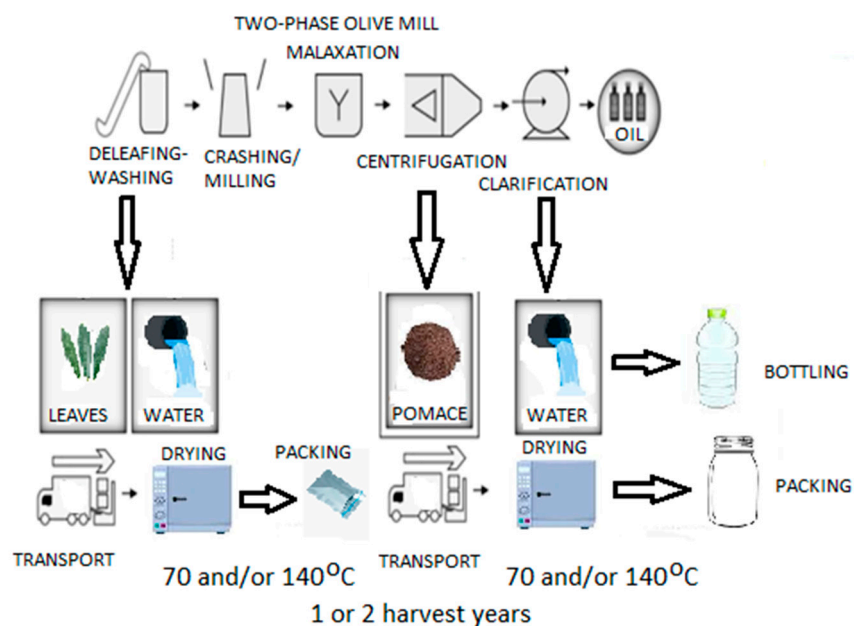

Figure S2. Sampling scheme.

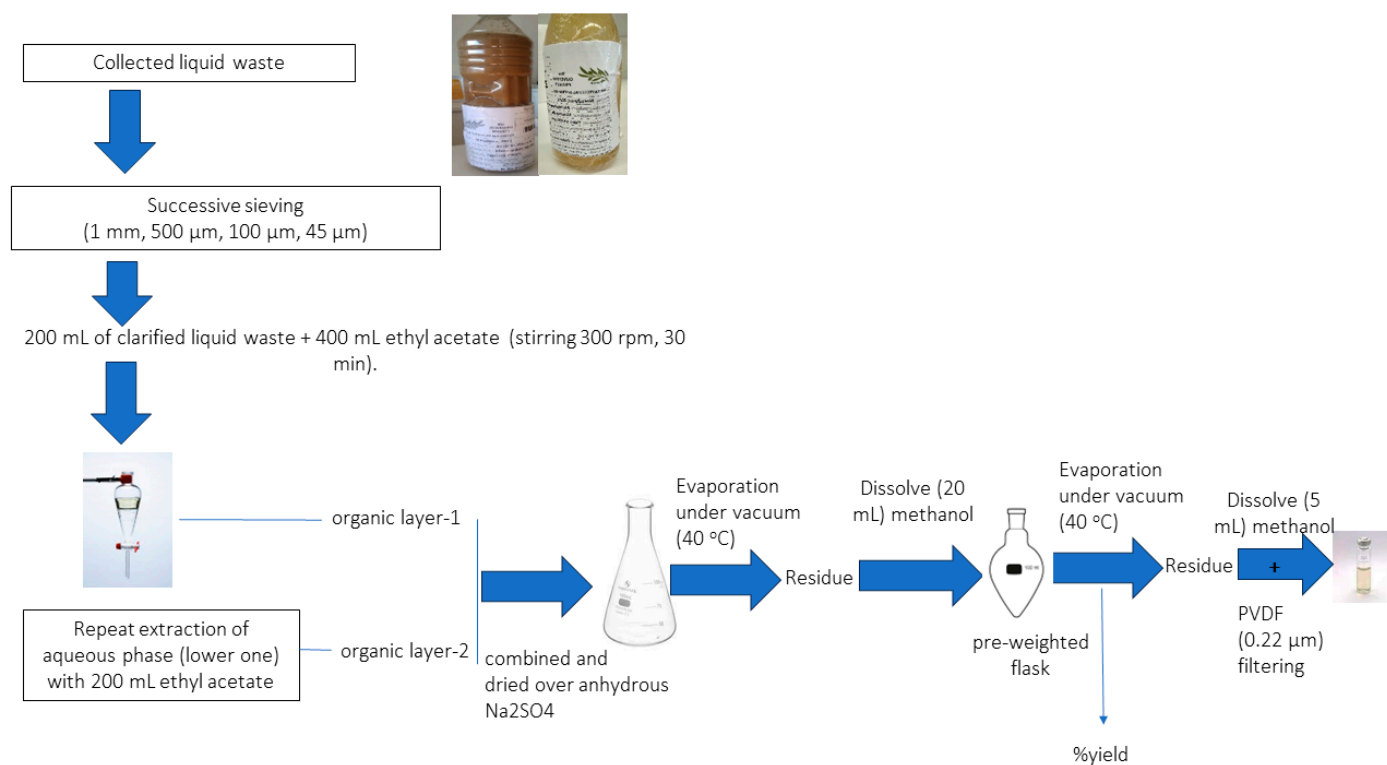

Figure S3. Extraction scheme of phenols from liquid waste.
